# Supplementary material
Source: PubMed Central journal article supplement (PMC1914127)

Figure S1

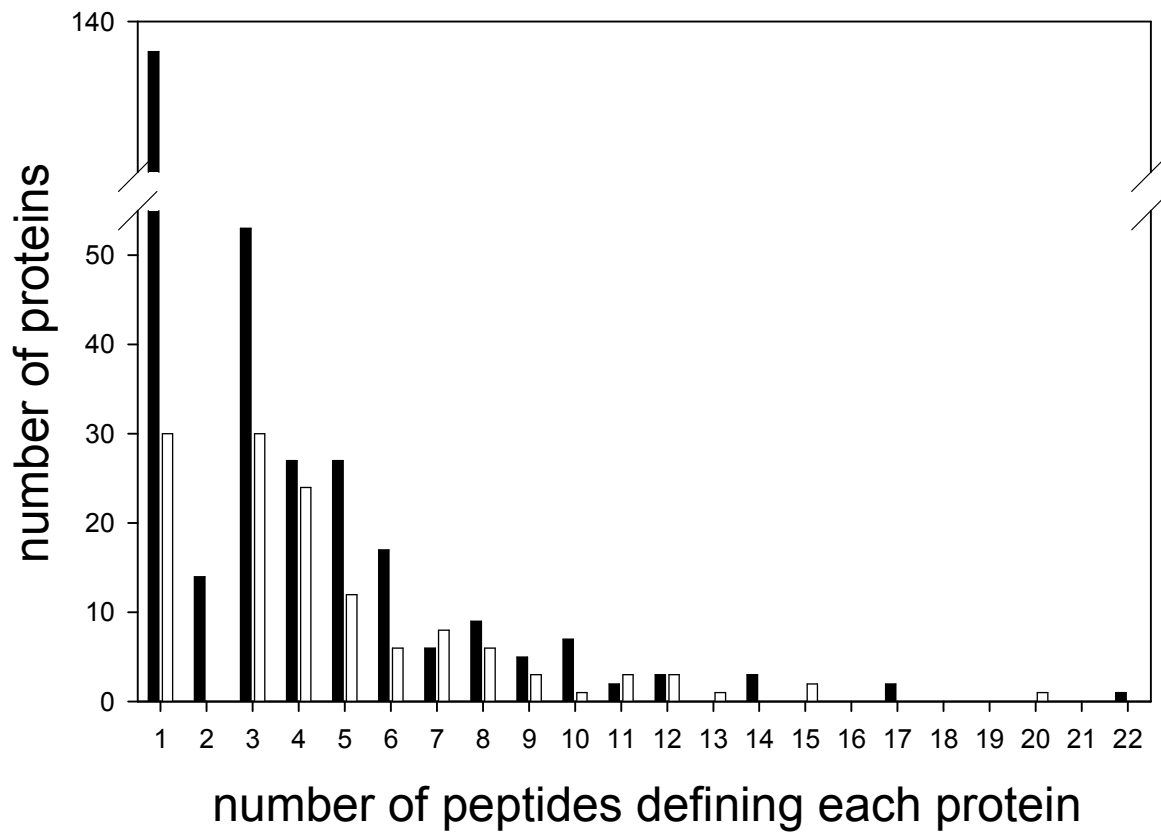

Figure S2

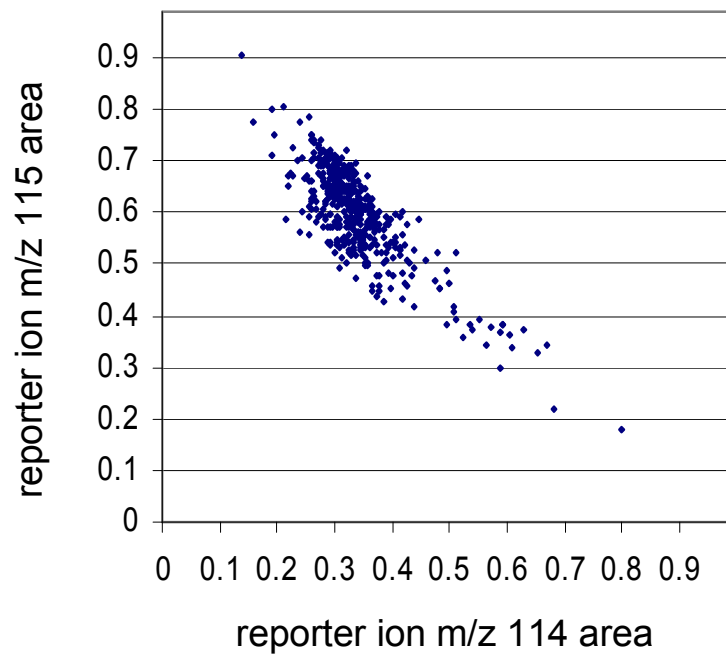

Figure S3

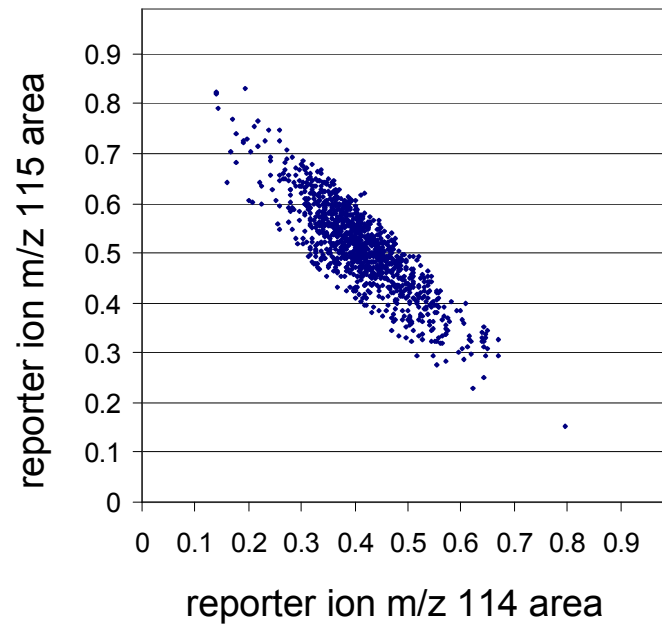

Supplement: plntphys_pp.107.096388_1.pdf [file plntphys_pp.107.096388_1.pdf]
